# Supplementary material for: Variations in current clinical practice of postoperative pericardial effusion: a questionnaire study
Source: HighWire-hosted journal article supplement (doi:10.1136/openhrt-2023-002271), 2023-04-01
Supplement: openhrt-2023-002271supp001_data_supplement.pdf [file openhrt-2023-002271supp001_data_supplement.pdf]

## Supplementary files

Supplementary table 1. Questionnaire

| Question no                        | Question:                                                                                                                                    | Answers:                                                                                                                                                                                                                                                                                                                                                                                                                                                                                                                                                                                                                                                                                                                                                                                                                                                                                                                                                                                                                                                                                                                                                          |
|------------------------------------|----------------------------------------------------------------------------------------------------------------------------------------------|-------------------------------------------------------------------------------------------------------------------------------------------------------------------------------------------------------------------------------------------------------------------------------------------------------------------------------------------------------------------------------------------------------------------------------------------------------------------------------------------------------------------------------------------------------------------------------------------------------------------------------------------------------------------------------------------------------------------------------------------------------------------------------------------------------------------------------------------------------------------------------------------------------------------------------------------------------------------------------------------------------------------------------------------------------------------------------------------------------------------------------------------------------------------|
| <i>Demographic data</i>            |                                                                                                                                              |                                                                                                                                                                                                                                                                                                                                                                                                                                                                                                                                                                                                                                                                                                                                                                                                                                                                                                                                                                                                                                                                                                                                                                   |
| 1.1                                | What is your profession?                                                                                                                     | <ul style="list-style-type: none"> <li>Cardiothoracic surgeon</li> <li>General cardiologist</li> <li>Interventional cardiologist</li> </ul>                                                                                                                                                                                                                                                                                                                                                                                                                                                                                                                                                                                                                                                                                                                                                                                                                                                                                                                                                                                                                       |
| 1.2                                | In which of the following cardiac centers do you work?                                                                                       | <ul style="list-style-type: none"> <li>Albert Schweitzer Ziekenhuis (Dordwijk)</li> <li>Amsterdam UMC, AMC</li> <li>Amsterdam UMC, VUmc</li> <li>Amphia Ziekenhuis (Breda)</li> <li>Canisius-Wilhelmina Ziekenhuis (Nijmegen)</li> <li>Catharina Ziekenhuis (Eindhoven)</li> <li>Erasmus MC (Rotterdam)</li> <li>ETZ TweeSteden (Tilburg)</li> <li>HagaZiekenhuis (Den Haag)</li> <li>HMC-Westinde (Den Haag)</li> <li>Isala (Zwolle)</li> <li>Jeroen Bosch Ziekenhuis (Den Bosch)</li> <li>LUMC (Leiden)</li> <li>Maasstad Ziekenhuis (Rotterdam)</li> <li>Maastricht UMC+</li> <li>Meander Medisch Centrum (Amersfoort)</li> <li>Medisch Centrum Leeuwarden</li> <li>Medisch Spectrum Twente (Enschede)</li> <li>Noordwest Ziekenhuisgroep (Alkmaar)</li> <li>OLVG (Amsterdam)</li> <li>Radboudumc (Nijmegen)</li> <li>Rijnstate Ziekenhuis (Arnhem)</li> <li>St. Antonius Ziekenhuis (Nieuwegein)</li> <li>Tergooi (Blaricum)</li> <li>Treant Ziekenhuis, locatie Scheper (Emmen)</li> <li>UMC Groningen</li> <li>UMC Utrecht</li> <li>VieCuri Medisch Centrum (Venlo)</li> <li>ZorgSaam (Terneuzen)</li> <li>Zuyderland Medisch Centrum (Heerlen)s</li> </ul> |
| <i>Therapeutic decision making</i> |                                                                                                                                              |                                                                                                                                                                                                                                                                                                                                                                                                                                                                                                                                                                                                                                                                                                                                                                                                                                                                                                                                                                                                                                                                                                                                                                   |
| 2.1                                | Which patients after cardiac surgery will undergo a routine postoperative echocardiography before discharge? (multiple answers are possible) | <ul style="list-style-type: none"> <li>None. Echocardiography only on clinical indication</li> <li>All patients after cardiac surgery</li> <li>After aortic valve surgery</li> <li>After mitral valve surgery</li> <li>After tricuspid valve surgery</li> </ul>                                                                                                                                                                                                                                                                                                                                                                                                                                                                                                                                                                                                                                                                                                                                                                                                                                                                                                   |

|                                                                                                                                                                                                                                                                                                                                                                                                                                                                                                                                                                                                                                                                                                                                                                                                                         |                                                                                                                                                                                                                                                                                                                                                                                                                                                                                                                                                                     |                                                                                                                                                              |
|-------------------------------------------------------------------------------------------------------------------------------------------------------------------------------------------------------------------------------------------------------------------------------------------------------------------------------------------------------------------------------------------------------------------------------------------------------------------------------------------------------------------------------------------------------------------------------------------------------------------------------------------------------------------------------------------------------------------------------------------------------------------------------------------------------------------------|---------------------------------------------------------------------------------------------------------------------------------------------------------------------------------------------------------------------------------------------------------------------------------------------------------------------------------------------------------------------------------------------------------------------------------------------------------------------------------------------------------------------------------------------------------------------|--------------------------------------------------------------------------------------------------------------------------------------------------------------|
| 2.2                                                                                                                                                                                                                                                                                                                                                                                                                                                                                                                                                                                                                                                                                                                                                                                                                     |                                                                                                                                                                                                                                                                                                                                                                                                                                                                                                                                                                     | <ul style="list-style-type: none"> <li>▪ CABG</li> <li>▪ Aortic surgery</li> <li>▪ Other: ...</li> </ul>                                                     |
|                                                                                                                                                                                                                                                                                                                                                                                                                                                                                                                                                                                                                                                                                                                                                                                                                         | if the decision is made to evacuate a sub-acute cardiac tamponade, is this preferably done by pericardiocentesis or surgical drainage?                                                                                                                                                                                                                                                                                                                                                                                                                              | <ul style="list-style-type: none"> <li>▪ Pericardiocentesis</li> <li>▪ Surgical drainage</li> </ul>                                                          |
| <i>Diagnostic decision making</i>                                                                                                                                                                                                                                                                                                                                                                                                                                                                                                                                                                                                                                                                                                                                                                                       |                                                                                                                                                                                                                                                                                                                                                                                                                                                                                                                                                                     |                                                                                                                                                              |
| 3.1                                                                                                                                                                                                                                                                                                                                                                                                                                                                                                                                                                                                                                                                                                                                                                                                                     | If imaging quality with TTE is insufficient to rule out a cardiac tamponade, which additional imaging modality is preferred in case of a <u>nonventilated</u> patient?                                                                                                                                                                                                                                                                                                                                                                                              | <ul style="list-style-type: none"> <li>▪ CT-scan</li> <li>▪ TEE</li> <li>▪ Other: ...</li> </ul>                                                             |
| 3.2                                                                                                                                                                                                                                                                                                                                                                                                                                                                                                                                                                                                                                                                                                                                                                                                                     | If imaging quality with TTE is insufficient to rule out a cardiac tamponade, which additional imaging modality is preferred in case of a <u>ventilated</u> patient?                                                                                                                                                                                                                                                                                                                                                                                                 | <ul style="list-style-type: none"> <li>▪ CT-scan</li> <li>▪ TEE</li> <li>▪ Other: ...</li> </ul>                                                             |
| <i>Patient scenarios</i>                                                                                                                                                                                                                                                                                                                                                                                                                                                                                                                                                                                                                                                                                                                                                                                                |                                                                                                                                                                                                                                                                                                                                                                                                                                                                                                                                                                     |                                                                                                                                                              |
| <p>Following are 4 different scenarios of a patient after cardiac surgery, with varying degrees of clinical/echocardiographic suspicion of cardiac tamponade. This is a “typical” patient on the ward (e.g. a 67 years old patient, 5 days after uneventful cardiac surgery). Echocardiography was performed demonstrating various amounts of pericardial effusion.</p> <p>Please specify what your recommended action would be in every depicted situation (only 1 of the following 4 options possible):</p> <ul style="list-style-type: none"> <li>A. No evacuation, no follow-up echocardiography</li> <li>B. No evacuation, echocardiography follow-up required (usually within 1 week)</li> <li>C. Immediate additional imaging required (e.g., TEE, CT)</li> <li>D. Evacuation of pericardial effusion</li> </ul> |                                                                                                                                                                                                                                                                                                                                                                                                                                                                                                                                                                     |                                                                                                                                                              |
| Scenario 1                                                                                                                                                                                                                                                                                                                                                                                                                                                                                                                                                                                                                                                                                                                                                                                                              | <p><b>Low clinical suspicion, low echocardiographic suspicion (during routine postoperative TTE).</b></p> <p>The patient has no dyspnea, tachycardia or hypotension, and normal diuresis. On echocardiography wide open atria and ventricles are demonstrated without vena cava inferior distension.</p> <p>What would your recommended action be based on the amount of pericardial effusion:</p> <ul style="list-style-type: none"> <li>▪ &lt;1cm pericardial effusion</li> <li>▪ 1-2 cm pericardial effusion</li> <li>▪ &gt;2 cm pericardial effusion</li> </ul> | <ul style="list-style-type: none"> <li>▪ None</li> <li>▪ Follow-up echocardiography</li> <li>▪ Immediate additional imaging</li> <li>▪ Evacuation</li> </ul> |
| Scenario 2                                                                                                                                                                                                                                                                                                                                                                                                                                                                                                                                                                                                                                                                                                                                                                                                              | <p><b>Low clinical suspicion, high echocardiographic suspicion (during routine postoperative TTE).</b></p> <p>The patient has no dyspnea, tachycardia or hypotension, and normal diuresis. On echocardiography collapse of the right and left</p>                                                                                                                                                                                                                                                                                                                   | <ul style="list-style-type: none"> <li>▪ None</li> <li>▪ Follow-up echocardiography</li> <li>▪ Immediate additional imaging</li> <li>▪ Evacuation</li> </ul> |

|            |                                                                                                                                                                                                                                                                                                                                                                                                                                                                                                                                                                                                                                                                                                                                                                                      |                                                                                                                                                              |
|------------|--------------------------------------------------------------------------------------------------------------------------------------------------------------------------------------------------------------------------------------------------------------------------------------------------------------------------------------------------------------------------------------------------------------------------------------------------------------------------------------------------------------------------------------------------------------------------------------------------------------------------------------------------------------------------------------------------------------------------------------------------------------------------------------|--------------------------------------------------------------------------------------------------------------------------------------------------------------|
|            | <p>atrium was demonstrated, with discrete distension of the vena cava inferior with blunted inspiratory response.</p> <p>What would your recommended action be based on the amount of pericardial effusion:</p> <ul style="list-style-type: none"> <li>▪ &lt;1cm pericardial effusion</li> <li>▪ 1-2 cm pericardial effusion</li> <li>▪ &gt;2 cm pericardial effusion</li> </ul>                                                                                                                                                                                                                                                                                                                                                                                                     |                                                                                                                                                              |
| Scenario 3 | <p><b>High clinical suspicion, low echocardiographic suspicion (during routine postoperative TTE).</b></p> <p>The patient complains of progressive dyspnea. Blood pressure is normal, but there is sinus tachycardia and oliguria in the absence of apparent shock and fever. Chest x-ray, ECG and urinalysis are inconclusive. On echocardiography wide open atria and ventricles are demonstrated, without vena cava inferior distension and without respiratory flow variations of the mitral- or tricuspid valve.</p> <p>What would your recommended action be based on the amount of pericardial effusion:</p> <ul style="list-style-type: none"> <li>▪ &lt;1cm pericardial effusion</li> <li>▪ 1-2 cm pericardial effusion</li> <li>▪ &gt;2 cm pericardial effusion</li> </ul> | <ul style="list-style-type: none"> <li>▪ None</li> <li>▪ Follow-up echocardiography</li> <li>▪ Immediate additional imaging</li> <li>▪ Evacuation</li> </ul> |
| Scenario 4 | <p><b>High clinical suspicion, high echocardiographic suspicion (during routine postoperative TTE).</b></p> <p>The patient complains of progressive dyspnea. Blood pressure is normal, but there is sinus tachycardia and oliguria in the absence of apparent shock and fever. Chest x-ray, ECG and urinalysis are inconclusive. On echocardiography a collapse of the right and left atrium was demonstrated, with discrete distension of the vena cava inferior with blunted inspiratory response.</p> <p>What would your recommended action be based on the amount of pericardial effusion:</p> <ul style="list-style-type: none"> <li>▪ &lt;1cm pericardial effusion</li> <li>▪ 1-2 cm pericardial effusion</li> <li>▪ &gt;2 cm pericardial effusion</li> </ul>                  | <ul style="list-style-type: none"> <li>▪ None</li> <li>▪ Follow-up echocardiography</li> <li>▪ Immediate additional imaging</li> <li>▪ Evacuation</li> </ul> |
