# Supplementary figures and images for: Variations in current clinical practice of postoperative pericardial effusion: a questionnaire study
Source: HighWire-hosted journal article supplement (doi:10.1136/openhrt-2023-002271), 2023-04-01

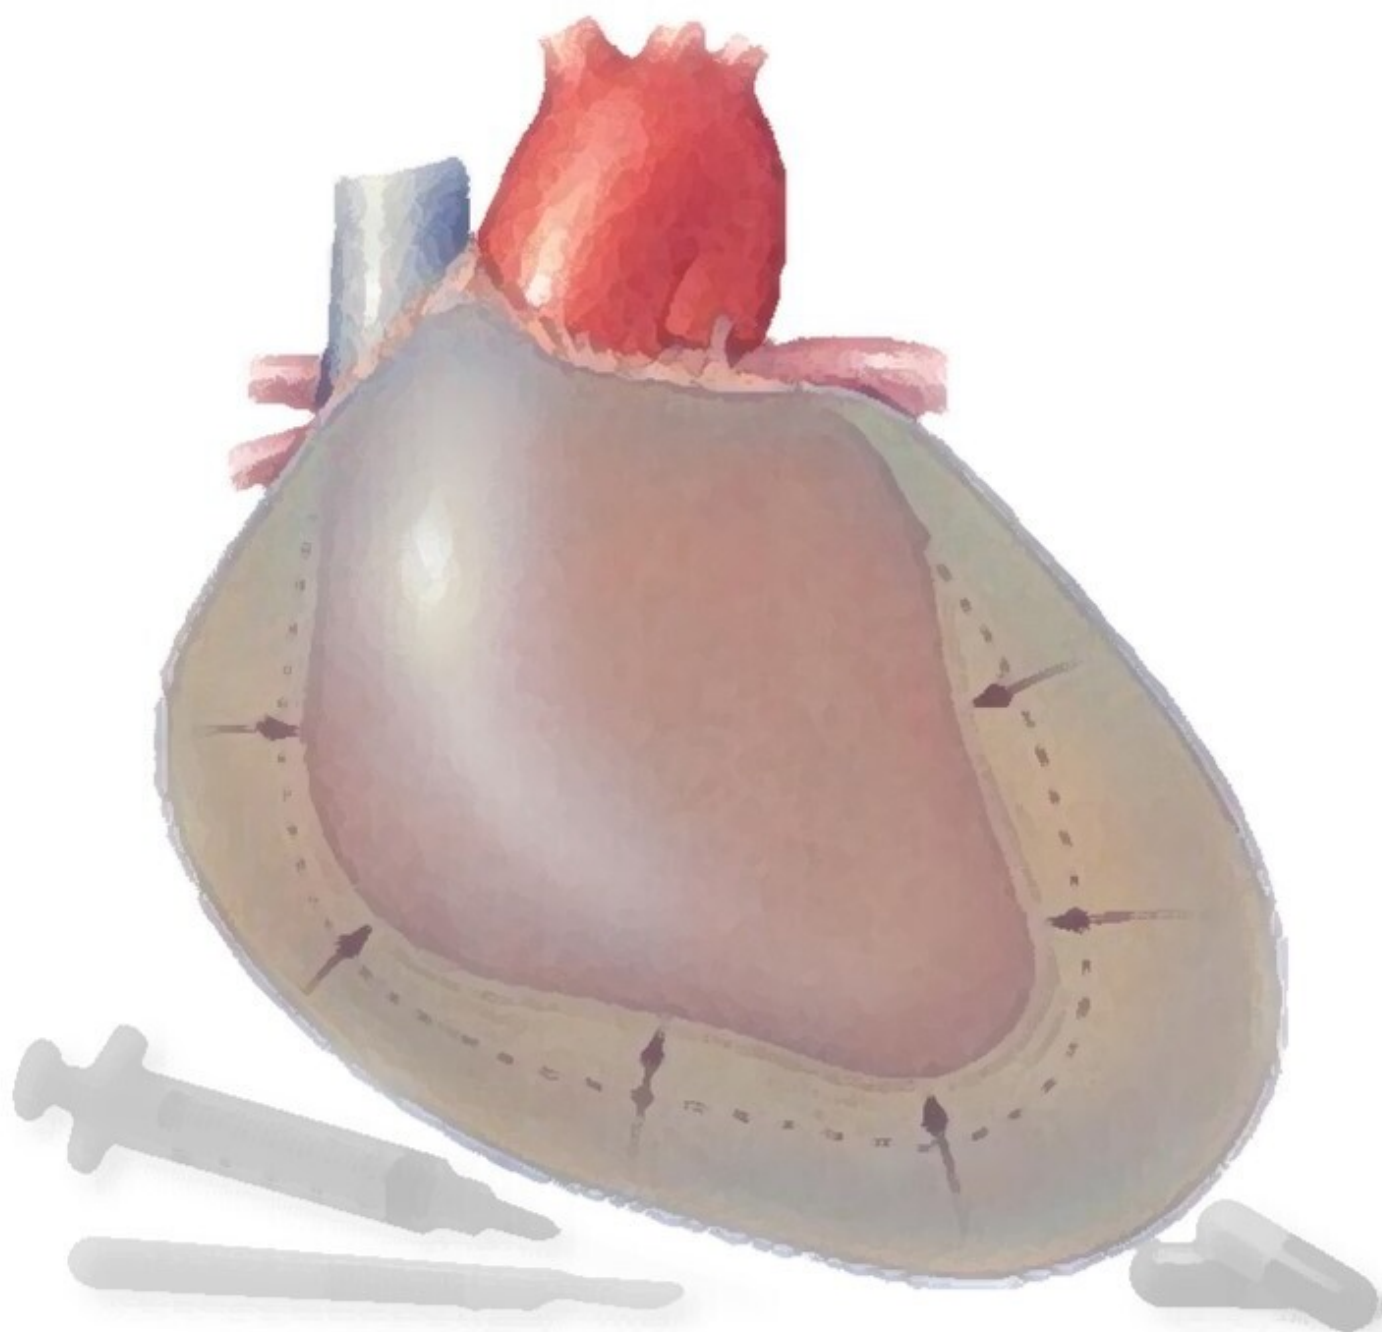

Supplement: openhrt-2023-002271supp002_data_supplement.pdf [file openhrt-2023-002271supp002_data_supplement.pdf]
